# Supplementary material for: Manipulating DNA writhe through varying DNA sequences
Source: Royal Society of Chemistry journal article supplement (doi:10.1039/c1cc11543j), 2011-01-01
Supplement: c1cc11543j.pdf [file c1cc11543j.pdf]

## **Supplementary Information**

### **Manipulating DNA writhe through varying DNA sequences**

Dawei Li\*, Zhaoqi Yang, Guanjia Zhao, Yi Long, Bei Lv, Cheng Li, Shuhui Hiew,  
Magdeline Tao Tao Ng, Juanjuan Guo, HongKee Tan, Hao Zhang and Tianhu Li

## EXTENDED EXPERIMENTAL PROCEDURES

**Reagents:** T4 DNA ligase, Nuclease BAL-31 and SacI were purchased from New England Biolabs (Ipswich, MA). Topo I was obtained from TopoGEN (Columbus, OH). Duplex linear DNA precursors were provided by Generay Biotech (Shanghai, China).

### Preparations of circular DNA

A 50  $\mu$ l solution containing 50 mM Tris-HCl, 10 mM MgCl<sub>2</sub>, 1 mM ATP, 10 mM dithiothreitol, 500 ng linear DNA and 20 U T4 DNA ligase was incubated at 16 °C for 8 hrs. The obtained circular DNA products were further analyzed using agarose electrophoresis (1.5%).

**Reactions of topo I with Circular DNA 1:** A solution containing 10 mM Tris-HCl, 150 mM NaCl, 0.1% BSA, 0.1 mM Spermidine, 5% glycerol, 200 ng Circle DNA 1 and 3 U topo I was incubated at 37 °C for 1 hr. The reaction products were further analyzed using agarose electrophoresis (1.5%).

**Reactions of SacI with circular DNA:** A solution containing 10 mM Bis-Tris-Propane-HCl, 10 mM MgCl<sub>2</sub>, 1 mM Dithiothreitol, mixtures of linear DNA and circular DNA (200 ng) and 10 U SacI was incubated at 37 °C for 1 hr. The reaction products were further analyzed using agarose electrophoresis (1.5%).

### AFM studies

Immobilization of DNA samples on micas were carried out following the previously reported procedures.<sup>S1,S2</sup> AFM images were obtained in Tapping Mode<sup>TM</sup> on a Multimode<sup>TM</sup> AFM (Veeco, Santa Barbara, CA) in connection with a Nanoscope V<sup>TM</sup> controller. Antimony (n) doped Si cantilevers with nominal spring constants between 20 and 80 N/m were selected. Scan frequency was 1.9 Hz per line and the modulation

amplitude was in a nanometer range. All DNA sample determinations were carried out in air at room temperature.

5' CGAAAAGTGCAAAAAGTCGGAAAAATCCGTGCAAAAATCGTCAAAAGGCCCGAAAAAATAGCTAAAAATCGTCGAAAAACTGCGTTGA  
3' TCGAGCTTTTCACGTTTTTCAGCCTTTTATAGGCACGTTTTTAGCAGTTTTCCGGGCTTTTTATCGATTTTATAGCAGCTTTTGACGCAACT  
AAAAGCTTAAAAACGATGCAAAAAGTGCATTCAAAAATGGGCAAAAAGTGGCCAAAAGCTATAAAAAACGCGCAAAAATCGCACTTTTGT  
TTTCGAATTTTGTACGTTTTTCACGTAAGTTTTTACCCGTTTTTCACCGGTTTTTCGATATTTTTTGCGCGTTTTTAGCGTGAAAAAC  
GAGTTTTTTCGGGCTTTTTTGGATCATTTTTTAGTCGTTTTTGGCCATTTTCGGCACTTTTTGCATATATTTGCCCGTTTTTGCCAATT  
CTCAAAAAGCCGAAAAAACCTAGTAAAAATCAGCAAAAACCGGTAAAGCCGTGAAAAACGTATATAAAACGGGCAAAAACGGTTAA  
TTTCGTATTTTCGCTATTTTTTGGCATTTTTTGGCCATTTTAGGCTTTTGGGTGGTTTTTCGGCCGTTTTTGGAGGTTTTCCAGATTTTGC  
AAAGCATAAAAGCGATAAAAAACCGTAAAAAACCGGTAAAAATCCGAAAAACCCAAAAAGCCGGCAAAAACCTCCAAAAGGTCTAAAACG  
ATTTTCAGTGCGTTTTTGGCCATTTTCGGCTGTTTTTGGCCATATATTTGCCCGTTTTTGCCAATTTTTTGCCAATTTTCGGGGTATTTT  
TAAAAGTCACGCAAAAACCGGTAAAGCCGACAAAAACCGGTATATAAAACGGGCAAAAACCGTTAAAAAACGGTTAAAGCCCCATAAAA  
CGCTATTTTTTGGCATTTTTTTGGCCATTTTGCAATGTTTTTTCAGTTTTTGTGCAAAAGCAGTGAAAAGTGGCCAAAATGCCGAAAAAT  
GCGATAAAAAACCGTAAAAAACCGGTAAACGTTACAAAAAAGTCAAAAAACACGTTTTTCGTCACTTTTCACCGGTTTTTACGGCTTTTAA  
CAGCGAAAAGCCGAAAAATGGCCGTAAAAATGGTAAAGAATTCAAAAATTCATAAAACCCAAAATGGCTGAGAAAAGGAGTGAAAAATG  
GTCGCTTTTCGGGCTTTTACCGGCATTTTACCATTCTTAAGTTTTTAAGTGATTTTGGGTTTACCGACTCTTTTCCTCACTTTTAC  
GTCCTAAAAACCGCAAAAATCTCTCAAAAATGAGCT 3' Linear DNA 1\*  
CAGGATTTTTGGCGTTTTTAGAGAGTTTTTAC 5'

- \* (1) Junctions between the segments that are highlighted in red and in blue represent the points at which adenine-rich and thymine-rich segments alternate between two opposite strands; and  
(2) This linear DNA contains two segments of continuous spaced adenine tracts in its sequence.

**Fig. S1.** Nucleotide sequences of Linear DNA 1 designed in our studies.



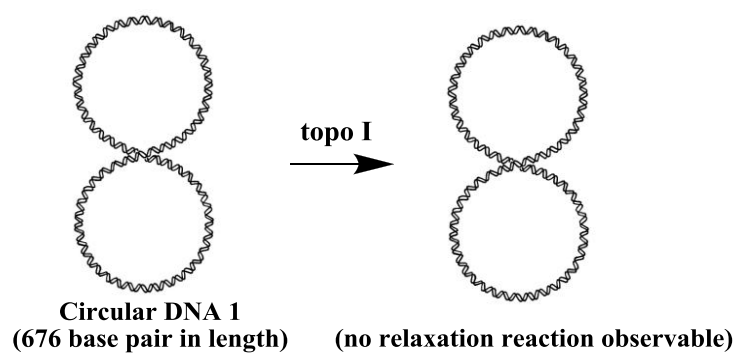

**Fig. S2.** Diagrammatic illustration of reaction of Circular DNA 1 with topo I.

A

```

5' CGCTACATAATACGACTCACTATTATATGTATAACTTCGTATAATGTATGCTATACGAAGTTATTGCTCGCAGTGTTACTGCAATCAT
3' TCGAGCGATGTATTATGCTGAGTGATAATATACATATTGAAGCATATTACATACGATATGCTTCAATAACGAGCGTCACAATGACGTTAGTA
CGTGGTGATTAACTCTTGTGTGTAATTCGTTACTCAACGAAGGTTAATTCACTATAGTTGTCCTGGTACTCTCTAGTGAATTCCTTAAGTGA
GCACCACTAATTAGAACACACATTAAGCAATGAGTTGCTTCCAATTAAGTGATATCAACAGGACCATGAGAGATCACTTAAGGAATTCACT
GTAGTATTAAGAAGTAAGTGAAGATGCTTCGAGTTATGTGACTGATAAGTATTCAATCAAGTCATTCTGAGAATAATGTATGTTACTATAA
CATCATAATTTCTTCATTACATTTCTACGAAGCTCAATACACTGACTATTCATAAGTTAGTTCAGTAAGACTCTTATTACATACAATGATATT
TCATGATTAGAACTCGAGTTGCTCTTGCAATGGTGTCAACGTTGGATAAATACTGACATAGCAGAACTTTAAAAGTGTTTCATTATTGGAAGATC
AGTACTAATCTTGAGCTCAACGAGAACGTACCACAGTTGCAACCTATTATGACTGTATCGTCTTGAAATTTTCACAAGTAATAACCTTCTAG
TGCGAACATGCTCAACGTTCTTACCTCTGTTGAGATCCAGTTCGATATAATTCAGTTGTGCACCAACTTATCTTCAGCATTACTTTCACCA
ACGCTTGTACGAGTTGCAAGAATGGAGACAACCTTAGGTCAAGCTATATTAAGTGAACACGTGGGTGAATAGAAGTCGTAATGAAGTGGT
GAGTTTCTGTGTGAGTAATCGGGAACAGGAAGGCAAGATTCAAATCTTAAAGTGAATAAGTTCGACACAGAAATGTTGAATGCTCATATCTC
CTCAAAGACACACTCATTAGCCCTTGTCTTCCGTTCTAAGTTTGAATTTCACTTATCAAGCTGTGTCTTTACAACCTTACGAGTATGAG
TTCCTTTAGCGACTTCAATACGCTTATTGAAGCATTTATAAGGGTTATTGTTACGTGAGTATAACTTCGTATAATGTATGCTATACGAAGTT
AAGGAAATCGCTGAAGTTATGCGAATAACTTCGTAAATATTCCCAATAACAATGCACCTCATATTGAAGCATATTACATACGATATGCTTCAA
ATGGCTCGAAGTCAGTTATAGATATCTAAGTGAGCT 3' Linear DNA 2*
TACCGAGCTTCAGTCAATATCTATAGATTAC 5'

```

\* This linear DNA contains no spaced adenine tract in its sequence.

B

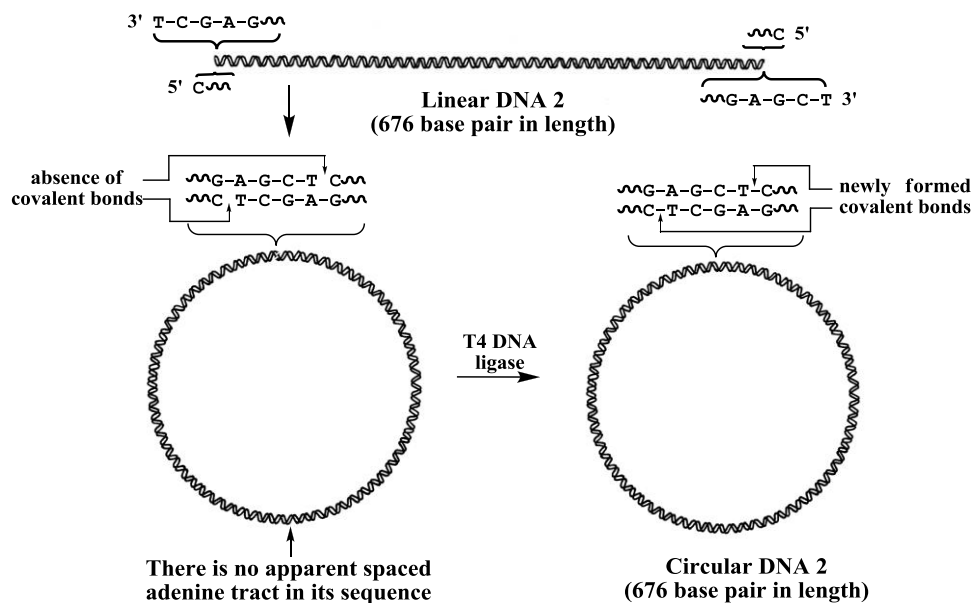

**Fig. S3.** Synthesis and confirmation of Circular DNA 2 (676 bp in length) from Linear DNA 2 (676 bp in length). (A) Nucleotide sequences of Linear DNA 2; (B) Diagrammatic illustration of synthesis of Circular DNA 2 from Linear DNA 2

3' 5' CAGTTGGGTAATTTTATAGGGTTTTCCAGTTTTGACGTTGTTTTTCGACGGAATTCCTTTTACGACTCACTTTTGCCTTGACTAG  
TCGAGTCAACCCATTAAAAATCCCAAAAGGGTCAAAACTGCAACAAAAAGCTGCCTTAAGGGAAAAATGCTGAGTGAAAAACGGAACGATC  
AGGGTTTTTACCAAGCTTTCTATTTTGGTCTTTTGCCATAACTTTTTATAGCATACATTTTACGAGTTTTATAAGCTGTTTTTCATGAGGC  
TCCCAAAAATGGTTCGAAAGATAAAAAACGAGAAACGGTATTGAAAAATATCGTATGTAAATGCTCAAAATATTCGACAAAAAGTACTCCG  
TTCTTTTATAGGTTTTTGTCTATGTTTTAATGGTATCTTTTTCGTCGGTGGCATTTTTCGGGGTTTTGCGCGGATCCCTTTTGTATG  
AAGAAAAATATCCAAAAACAGTACTAAATTACCATAGAAAAAGCAGCCACCGTAAAAAGCCCCAAAAACGCGCTAGGGGAAAAACAAATAC  
GGCCTTTTTACATCAGGTTTTTTCGGCTCAGCAATGATTTTTGCCCCTTTTAGATTTTTCAATGATATTTTAGGCGTTTTTGACGTTTTTCAG  
CCGGA AAAATGTAGTCCAAAAAGGCGAGTCTTACTAAAAACGGGAAAAATCTAAAAAGTTACTATAAAAAATCCGCAAAAAACGCAAAAGTC  
TTTTTCGGTGTGCGCCTTTTTTCCCTTTTTTGGCATTTTTTTCGGCATTTTTTTGCATATATTTTTTGGAGTTGTTTTGATCCGTTTTGATTT  
AAAAAGGCACAGCGGAAAAAGGGA AAAACGCGTAAAAAGCCGTAAAAAGCGTATATAAAAAACCTCAACAAAACTAGGC AAAAATAA  
TCAGTGCCTTTTTGGCCATTTTGCCCTAGTTTTTTGCGTTGCTATTTTTTGTTAATTTTTGCCAATTTTCGTATTTTCGCTATTTTTTGGCAT  
AGTCACGCAAAAACCGGTAAAAACGGATCAAAAAACGCAACGATAAAAAACAATTAAAAACGGTTAAAAAGCATAAAAAGCGATAAAAAACCGTA  
TTTTTGACCATTTTTCTTGTGTTTTGGATGGTTTTTCGGCCGTTTTTGGAGTTGAATTTTACGTCCAGATTGATTTTCAGTGCCTTTTTTGGCC  
AAAAACTGGTAAAAAGAACAAAACCTACCAAAAAGCCGGCAAAAAACCTCAACTTAAATGCAGGTCTAAACTAAAAAGTCACGCAAAAACCGG  
ATTTTGCAGTGTTTTTGCTCTGCTATTTTTGTTAATTTTTGCCAATTTTCGAGGTATTTTCGCTATTTTTTGGCATTTTTTGTCTCATT  
TAAACGCTCACAAAAACGGAGACGATAAAAAACAATTAAAAACGGTTAAAAAGCTCCATAAAAGCGATAAAAAACCGTAAAAAACAGAGTAA  
TTTTAGTCGTTTTTGGCCATTTTTCCCTGTTTTTGCTCACCCTTTTTCGCTGGTGCCGAGTTTTTGATGCTTTTTTGACGTTTTTGTGACGAGT  
AAAACTCAGCAAAAACCGGTAAAAAGGACAAAAACGAGTGGGTAAAAAGCGACCGGCTCAAAAACTACGAAAAACGTCAAAACACGTGCTCA  
TTTTGACATCGGACTGGTTTTTCACAGCGGTTTTTCAGGCTTTTTGCACAACATTTTTCATGTATTTTGAAGGAGAGAAGATTTTGGGCTCAGT  
AAAACGTAGCTGACCAAAAGTGTGCGCAAAAGTCCGAAAAACGTGTTGTAAAAAGTACATAAACTTCTCTCTCTTAAAAACCCGAGTCA  
TTTGATACCCGACGATTTTGACACCACGATTTTTGCAGGCGTTTTTGAGCCATTTTTCGCTATAGCATTTTGGATACGATGTTTTCCATGTT  
AAACTATGGGCTGCTAAAACTGTGGTGCTAAAAACGTCCGCAAAAACTCGGTAAAAACGCATATCGTAAAAACCTATGCTACAAAAGGTACAA  
TTAGTGGTTTTTGACGTAGCTTTTCGAAGCTTTTAGTCATTTTTATAGCTGTTTTTGTGTGAGATTTTATCCGCTCACTTTTCGAATTCCTT  
AATCACC AAAAAGCTTCGAAATCAGTAAAAATATCGACAAAAACACACTCTAAAAATAGGCGAGTGAAGGCTTAAGGAA  
TTTACGAGCCGATTTTTCGGGTGTGGCTTTTTGTCCGTTTTTCTGTTTGAAGT 3' Linear DNA 3\*  
AAATGCTCGGCCTAAAAACGCCACACCGAAAAACAGGCAAAAGGACAAAC 5'

- \* (1) Continuous spaced adenine tracts occur exclusively in one of the double strands of this linear DNA; and  
(2) The duplex segments highlighted in blue and green are those that possess high and low degrees of curvatures separately.

**Fig. S4.** Nucleotide sequences of Linear DNA 3.



5' CGAAAAGTCGAAAAGTCGGAAGATCCGTGCAAAATCGTCAAAAGAATTCAAAAATAGCTAAAAATCGTCGAAAACGCGTTGA  
3' TCGAGCTTTTACGTTTTTACGCTTTTATAGGCACGTTTTTAGCAGTTTTCTTAAGTTTTTATCGATTTTTAGCAGCTTTTACGCAACT  
AAAAGCTTAAAAACGATGCAAAAAGTGCATTCAAAAATGGGCAAAAAGTGGCCAAAAGCTATAAAAAACGCGCAAAAATCGCAGTTTTTT  
TTTTCGAATTTTTGCTACGTTTTTACGTAAGTTTTTACCGGTTTTTACCGGTTTTTCGATATTTTTTGCAGTTTTTACGCTGAAAAA  
GCATATATTTTTTGGAGCTTTTGTATCCGTTTTGATTTTTAGTGCCTTTTTGGCCATTTTGCCCTAGTTTTTGCCTTGTATTTTTGT  
CGTATATAAAAAACCTGCAACAAAACCTAGGCAAACTAAAAGTCACGCAAAAACCGGTAAAACGGGATCAAAAACGCAACGATAAAAAACA  
TAATTTTTGCAATTTTTCGGTATTTTCGCTATTTTTTGGCATTTTTTGACCATTTTTCTTGTGTTTGGATGGTTTTGCGGAAAAAGTGGCGA  
ATTAACCAAGGTTAAAGCCATAAAAGCGATAAAAAACCGTAAAAAACTGGTAAAAAGAACAAACCTACCAAAACGGCTTTTTACCGCT  
AAAGTGCAAAAGTCGGAAGGAGTCAAAAGTGGCCAAAATGCCGAAAATCAGCGAAAAGGATTCAAAAATCACTAAACCCAAAAT  
TTTACGTTTTTACGCTTTTCTGAGTTTTTACCGGTTTTTACGGCTTTTATAGTCGTTTTCTTAAGTTTTTAAGTATTTTGGGTTTTA  
GGCTGAGAAAATGGGCAAAAAGTGGCCAAAAGCTATAAAAAATCCGTGCAAAAATCGTCAAAAGGCCGCAAAAATAGCTAAAAAGCAAT  
CCGACTCTTTTACCGTTTTTACCGGTTTTTTCGATATTTTTTATAGGCACGTTTTTACGAGTTTTTCCGGGCTTTTTATCGATTTTTCGTTA  
GAAAACTGCGTTGAAAAAGGTAAAAACGATGCAAAAAGTGCATTCAAAAACGCGCAAAAACCGCAAAAATCTCTCAAAAATGAGGTAAAA  
CTTTTTCGCACTTTTTCGCTACGTTTTTACGTAAGTTTTTGCAGTTTTTGGCGTTTTTGGCGTTTTTACGAGTTTTTACCTCCATTTT  
ATGGCCGTAAAAATGGTAAAGGAGTGAAGAGCCGAAAAATGGTCTAAAAATCGCACCGGCGTTTTTTGGAGTTGAATTTTACGTCAG  
TACCGGCATTTTACCATTTTCTCACTTTTTCGGGCTTTTTTACCGGATTTTATAGCTGGCCGGCAAAAACCTCACTTAAAAATGCAGGTC  
ATTTGATTTTTCAGTGCCTTTTGGCCATTTTGTCTTTTTTGGCTCTGCTATTTTTGTTAATTTTGGCAATTTTTCGAGGTATTTTCGCTA  
TAACTAAAAGTCACGCAAAAACCGGTAAAACGACAAAAACCGAGACGATAAAAAACAATTAAAAACGGTTAAAAGCTCCATAAAAGCGAT  
TTTTTGGCATTTTGTCTCATTTTTTAGTCGTTTTTGGCCAAAAGTGGAAAAAGCAGTGAAGAGTGGCCAAAATGCCGAAAAATCAGC  
AAAAACCGTAAAAACAGAGTAAAAATCAGCAAAAACCGGTTTTTACCTTTTTCGTCATTTTACCGGTTTTTACGCTTTTTTAGTCG  
GAAAAGCCGAAAAATGGCGTAAAAATGGTAAAGGAGTAAAAATCACTAAACCCAAAATGGCTGAGAAAAGTAAAAATGAGTCC  
CTTTTCGGGCTTTTTACCGGATTTTACCATTTTCTCACTTTTTAAGTATTTTGGGTTTTTACCGACTCTTTTCTTAAGTTTTTACAG  
TAAAAACCGCAAAAATCTCTCAAAAATGAGCT 3' Linear DNA 5'  
ATTTTGGCGTTTTTACGAGTTTTTAC 5'

- \* (1) Junctions between the segments that are highlighted in red and in blue represent the points at which adenine-rich and thymine-rich segments alternate between two opposite strands; and  
(2) This linear DNA contains four segments of continuous spaced adenine tracts in its sequence.

**Fig. S6.** Nucleotide sequences of Linear DNA 5.

A

5' CTAGATCATAGTCGCAATTAACAGATTAAGTTGAGTAACACCAGAGTTCACAGTCACGAAGTTGTAATTAACGACGACCAGTCAGTAA  
3' TCGAGATCTAGTATCAGCGTTAATTGTCTAATTCAACTCATTTGGTCTCAAGTGTGAGTCTCAACATTAATTGGTCTGGTCAGTCATT  
TACGACTCACTTAAGACATTGACTAGAGGATACCAACATAGGTATATAGAACCAATCTAGAGCCATAACTTCGTATAGAATACATTATACGA  
ATGCTGAGTGAAATTCGTAACTGATCTCTATGGTTGTATCCATATATCTTGGTTAGATCTCGGTATTGAAGCATATCTTATGTAATATGCT  
AGTTATATAAGATGTCAAACATGAGAATTATGTTATAGTTAAATGTAATGATAATAATGATTTCTTAGAAGTCAGATGACACTTTTCAGAG  
TCAATATATTTACAGTTTGTACTCTTAATAACAATATCCAATTACATTACTATTATTACTAAAGAATCTTCAGTCTACTGTGAAAAGTCTC  
AAATGTAAGCAGAACACATATTTATTTATTTCTAAATACATTCAAAATATGTATCAGCTCATGAGACAATAACCATGATAAATGATTCAATAA  
TTTACATTCTGCTTGTGTATAAATAAATAAGATTTATGTAAGTTTATACATAGTCGAGTACTCTGTTATTGGTACTATTACTAAGTTATT  
TATTGAATTAAGGAAGAGATGAGTATTTCAACATTTCCGTGTCTTATTTCCCTTATAAGCGACTTATTGCCTTCATGTTCCCTTTGATCAC  
ATAACTTAATTTCTCTCATCTCATAAGTTGTAAGGCACAGTGAATAAGGGAATATTCGCTGAATAACGGAAGTACAAGGAAGTACTG  
CCAGGAATTCGGTGAAGATGATGAAGATAAGTTGGGTGAACGAATGGATTACATAGAAGTGGATCTCAACAGAGGTAAGTTAAG  
GGTCTTAAGACCACTTTCATTCTCTACTACTTCTATTCAACCCACTTGCTTACCTAATGTATCTTGACCTAGAGTTGTCCTCAATTC  
ATTTGCACAACATGAAGGATCATGTAACTAGAATTGATAGAAGGAGAGAAGAGATGGAGCTCAATGAAGCCATACCAAAACGACGAGCGTGAC  
TAAACGTGTTGTACTTCTTAGTACATTGATCTTAACATATCTTCTCTCTTCTACCTCGAGTTACTTCGGTATGGTTTGTCTGCTCGCACTG  
ACAACGATGACTGCAGGAATTAATAGAGCCATAACTTAGTATAGCATACATTATACGAAGTTATCCATGGACTAGTGAGTCGTATTACGTAG  
TGTGCTACTGACGTCCTTAATTATCTCGGTATTGAATCATATCGTATGTAATATGCTTCAATAGGTACCTGATCCTCAGCATAATGCATC  
ATTTGAGTAATAATGGTCATAGCTGTTTACTGTATGAAATTTGTTATAAGCTCACAATTACACACAACATACGAGCCGGAAGCATAAAGTGA  
TAACCTCATTATTACAGTATCGACAAATGACATACTTTAACAATATTCGAGTGTAAATGTGTGTGTATGCTCGGCCTTCGTATTTCACAT  
AAGTGAGAGGAATTAACCATGGATCAGGTAAGTGATATCGAAGACTTAACGCTAGAATTTCGATAACCTATAGTGAGTCGTATTACATGGTCA  
TTCACTCTCTTAATTTGGTACCTAGTCCATTCACTATAGCTTCTGAATTGCGATCTTAAGCTATTGGATATCACTCAGCATAATGTACAGT  
TAGCTGTTCTGGCAGCTCTGACCAATGTCTCAATCAATCTATGATGTTACATTGCACAAGATAAAGGAATATATCATCATGAACAATAACCA  
ATCGACAAGACCGTCGAGACTGGTTACAGAGTTAGTTAGATACTACAATGTAACGTGTTCTATTTCCTTATATAGTAGTACTTGTATTGGT  
ACTGCTGATTACATAAACAGTAATACGAGCT 3' Linear DNA 6\*  
TGACAGACTAATGTATTGTCATTATGC 5'

\* This linear DNA contains no spaced adenine tract in its sequence.

B

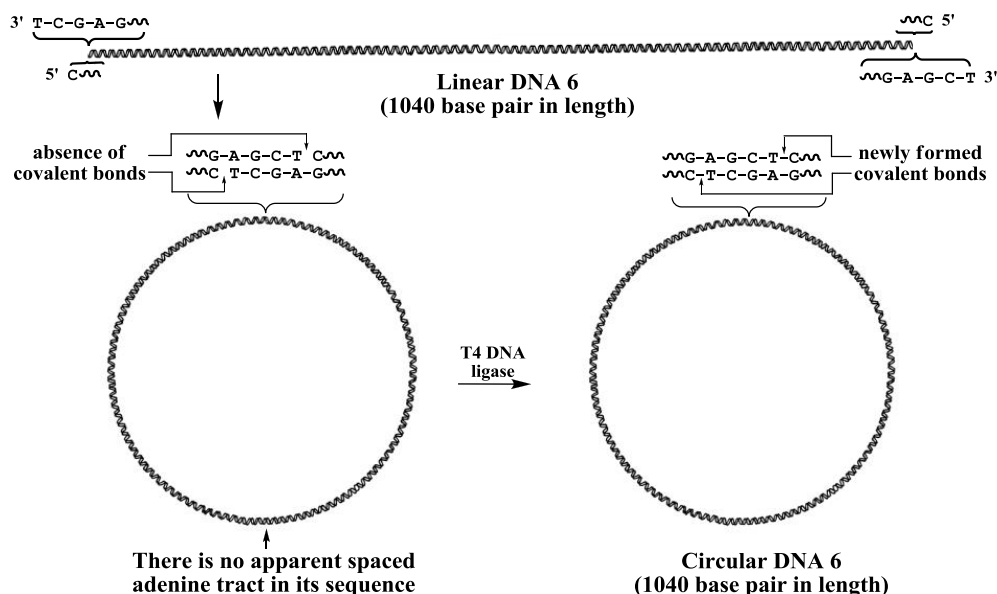

**Fig. S7.** Synthesis and confirmation of Circular DNA 6 (1040 bp in length) from Linear DNA 6 (1040 bp in length). (A) Nucleotide sequences of Linear DNA 6; (B) Diagrammatic illustration of synthesis of Circular DNA 6 from Linear DNA 6.

**References for Supplementary Information:**

- S1. Y. L. Lyubchenko and L. S. Shlyakhtenko, *Methods*, 2009, **47**, 206-213.
- S2. Y. L. Lyubchenko, A. A. Gall, L. S. Shlyakhtenko, R. E. Harrington, B. L. Jacobs, P. I. Oden and S. M. Lindsay, *J. Biomolec. Struct. Dyn.*, 1992, **9**, 589-606.
